# Supplementary material for: Fungal Diversity in Intertidal Mudflats and Abandoned Solar Salterns as a Source for Biological Resources
Source: PubMed Central journal article supplement (PMC6891761; doi:10.3390/md17110601), 2019-10-23
Supplement: marinedrugs-17-00601-s001.pdf [file marinedrugs-17-00601-s001.pdf]

**Table S1.** The  $\alpha$ -diversities of culturable fungal isolates from abandoned salterns and intertidal mudflats.

| Sample                                     | Shannon-Wiener index<br>(H') | Gini-Simpson index<br>(D <sup>s</sup> , 1- $\lambda$ ) |
|--------------------------------------------|------------------------------|--------------------------------------------------------|
| <b>Gopado</b>                              |                              |                                                        |
| Abandoned saltern ( <b>Recovered</b> )     | 0.693                        | 0.500                                                  |
| Mudflat                                    | 0.693                        | 0.500                                                  |
| <b>Yubudo</b>                              |                              |                                                        |
| Abandoned saltern ( <b>Recovered</b> )     | 1.946                        | 0.857                                                  |
| Mudflat                                    | 0.000                        | 0.000                                                  |
| <b>Yongyudo</b>                            |                              |                                                        |
| Abandoned saltern ( <b>Non-recovered</b> ) | 2.642                        | 0.907                                                  |
| Mudflat                                    | 2.707                        | 0.926                                                  |

Mean values were presented. \* statistical significance of  $p < 0.05$

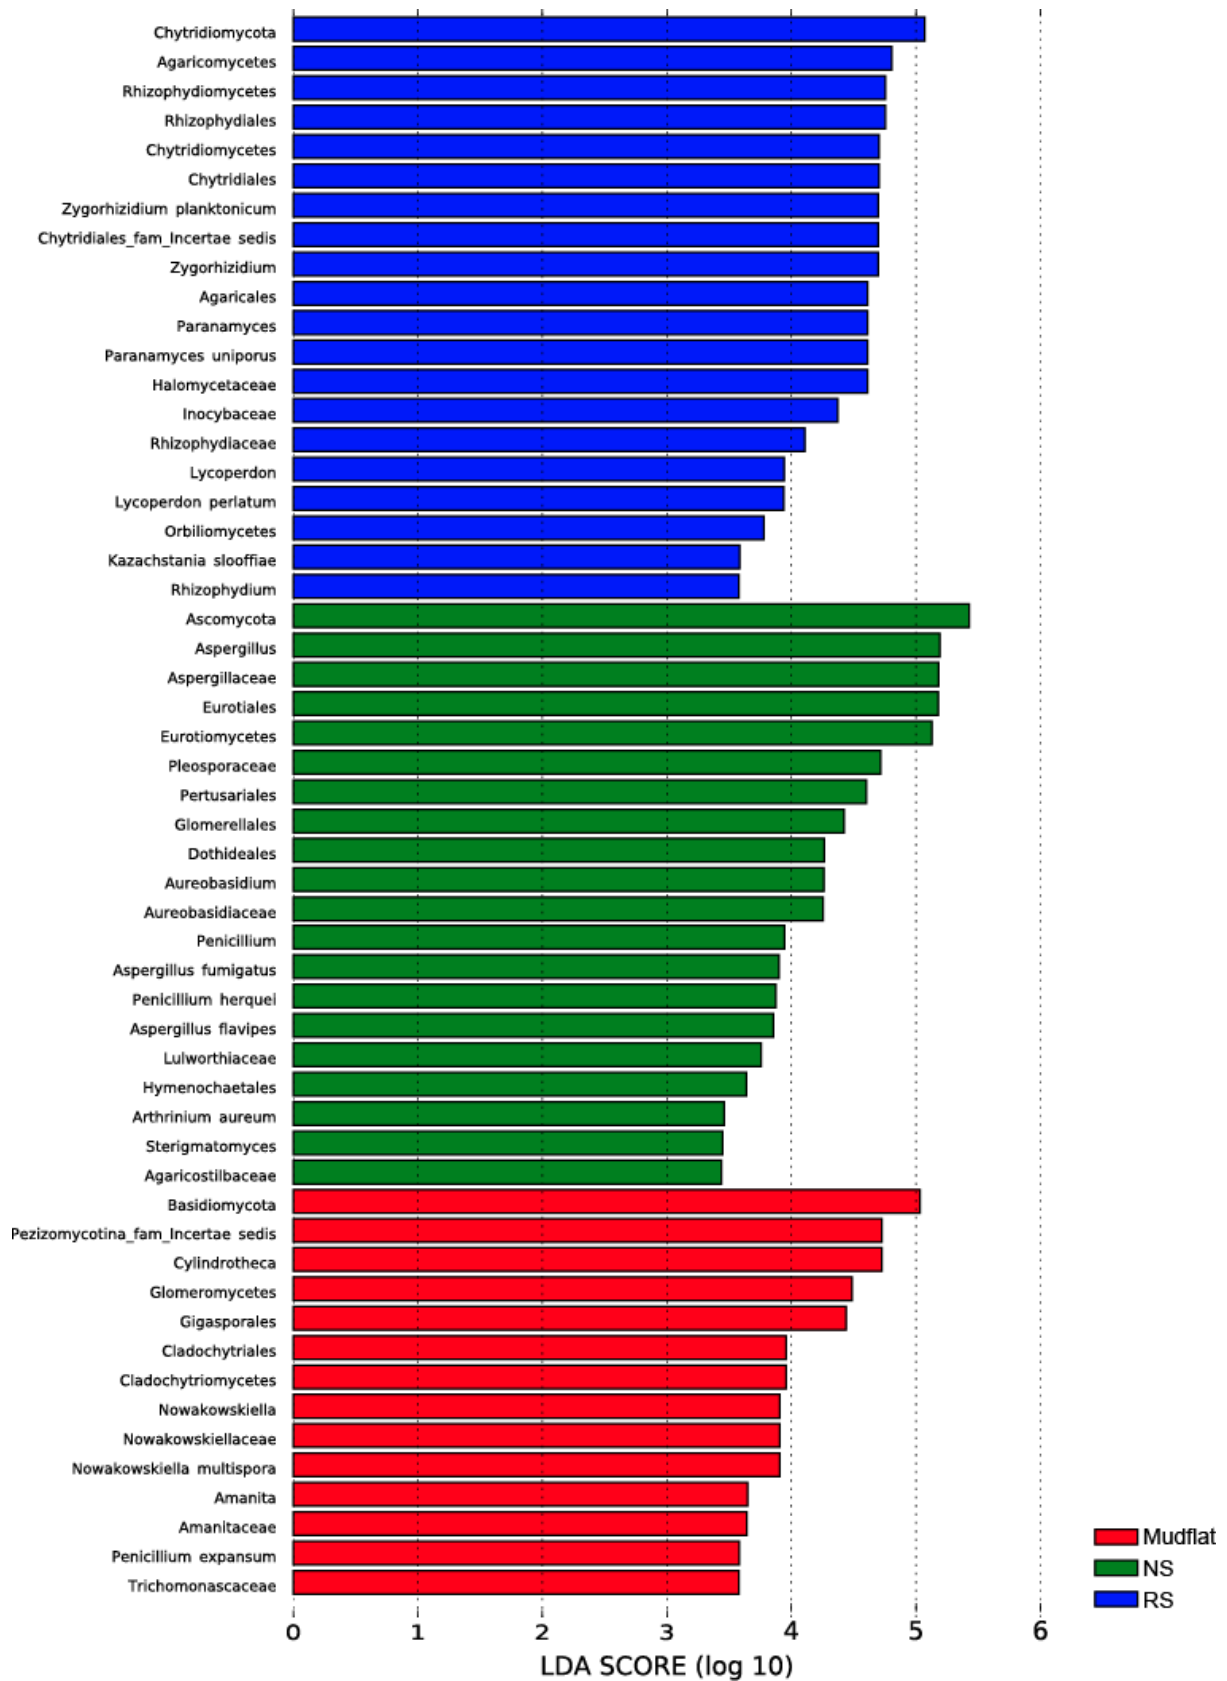

**Figure S1.** Linear discriminant analysis (LDA) scores of the fungal taxa of which score > 2. NS and RS mean non-recovered saltern and recovered saltern, respectively.

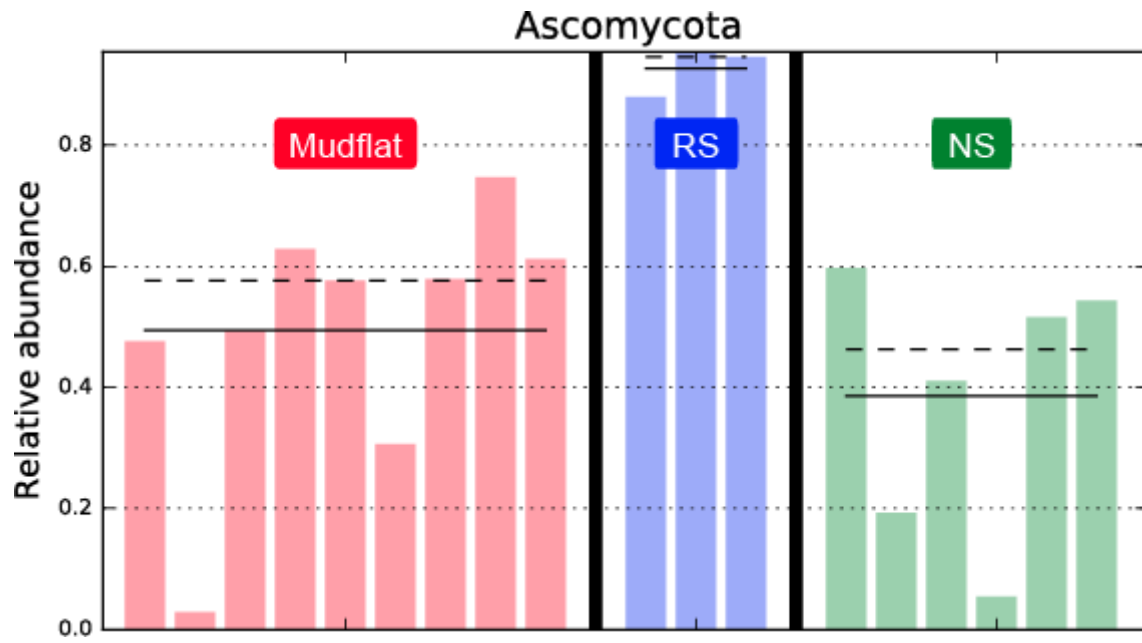

**Figure S2.** Relative abundance of Ascomycota in the three different intertidal environments. NS and RS mean non-recovered saltern and recovered saltern, respectively.

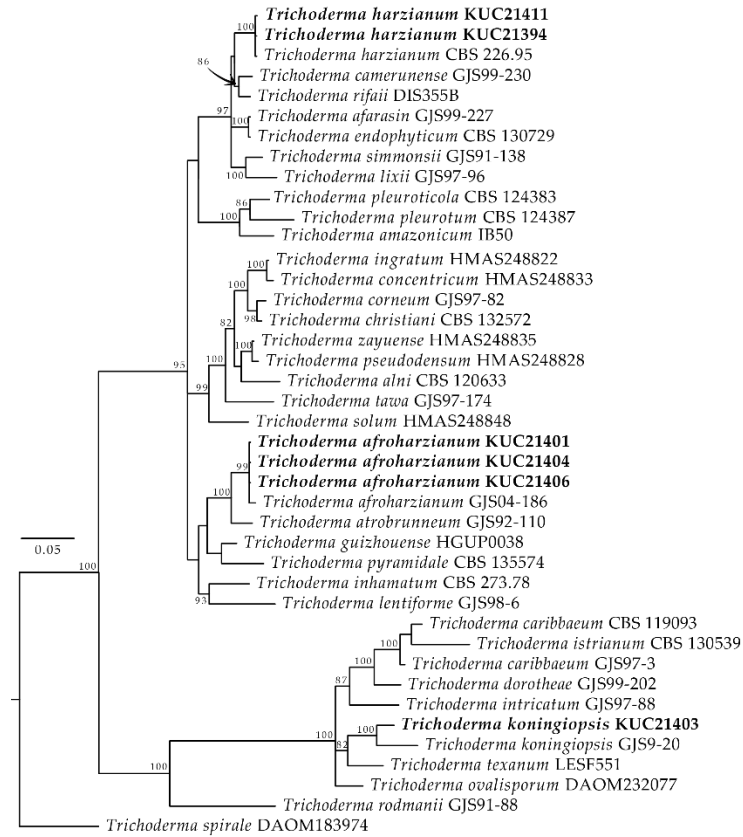

**Figure S3.** The Bayesian analysis tree based on EF1- $\alpha$  for *Trichoderma* complex. Bayesian posterior probabilities (PP) at the nodes are presented if > 75. All of reference strains are type and ex-type strains. The fungi isolated from this study are in bold. The scale bar means the number of nucleotide substitutions per position.

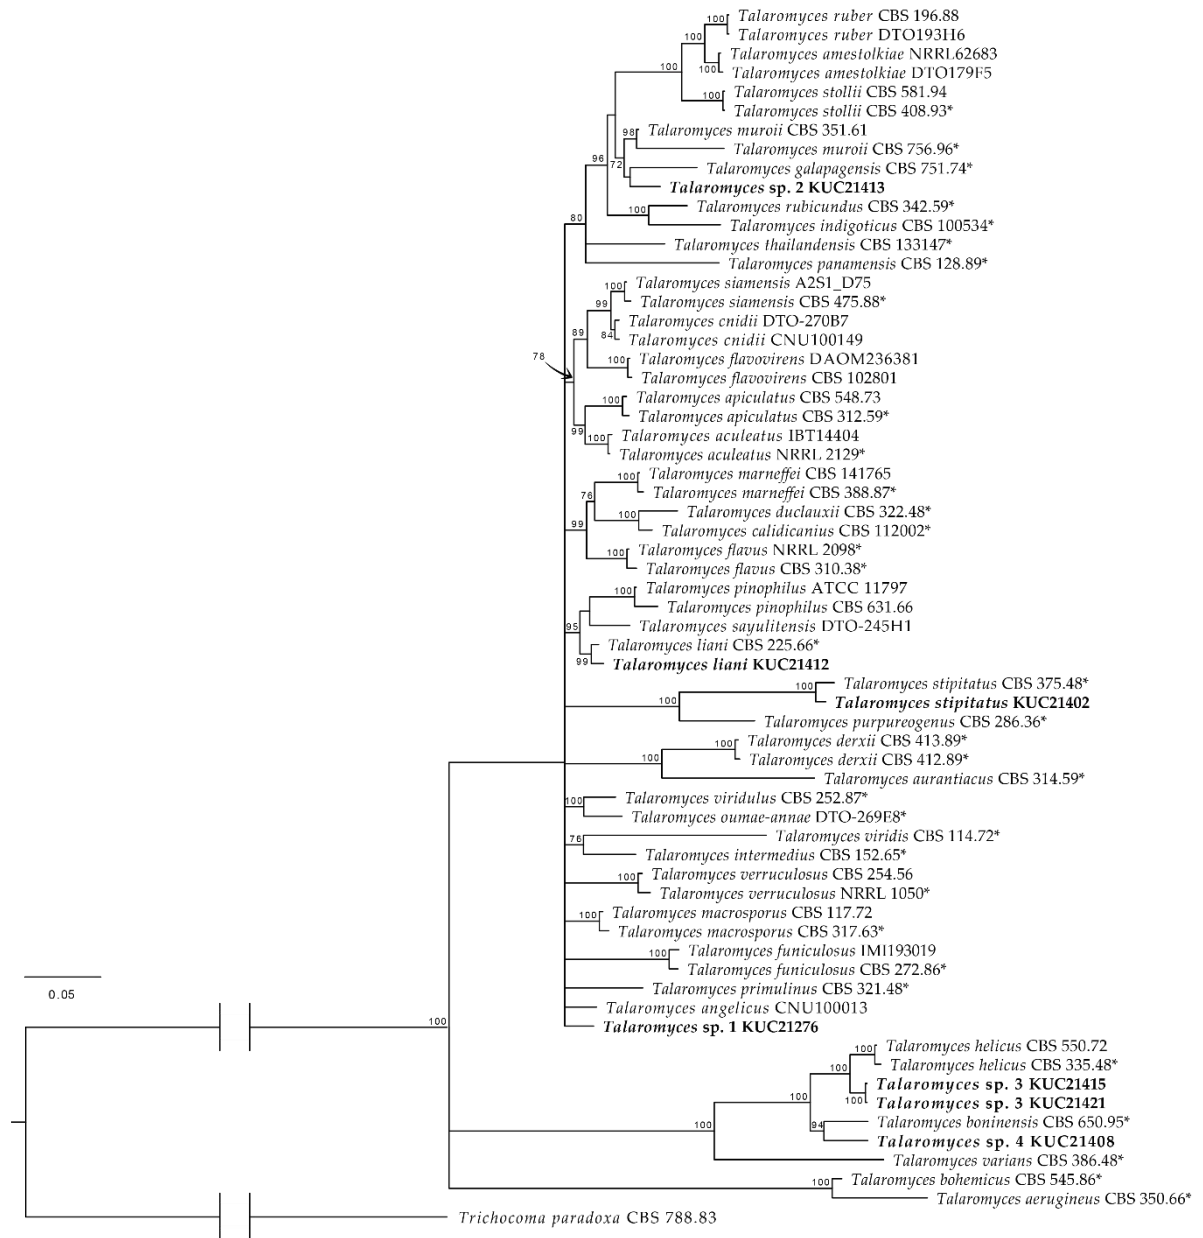

**Figure S4.** The Bayesian analysis tree based on combined of ITS and *benA* for *Talaromyces* complex. Bayesian posterior probabilities (PP) at the nodes are presented if > 75. Type strains are indicated as \*. The fungi isolated from this study are in bold. The scale bar means the number of nucleotide substitutions per position.
